# Supplementary material
Source: PubMed Central journal article supplement (PMC4175036)
Supplement: NIHMS608533-supplement-01.pdf [file NIHMS608533-supplement-01.pdf]

**Supplementary table 1: RT-PCR primers**

| <b>Species</b> | <b>Gene</b>    | <b>Access number</b> | <b>Forward primer (5' to 3')</b> | <b>Reverse primer (5' to 3')</b> |
|----------------|----------------|----------------------|----------------------------------|----------------------------------|
| Mouse          | Pnpla3         | NM_054088.3          | GGATCACAGGATCTGGGCTA             | TGCACTCCCTGGTGTGTTTA             |
| Mouse          | Srebp1c        | NM_011480.3          | GTGAGCCTGACAAGCAATCA             | ACCAAGCCAGCAAATACACC             |
| Mouse          | Acc-1          | NM_133360.2          | ACCTGCCACAGAAACCATTC             | CGTGCTGTAGCAAAGTGGA              |
| Mouse          | Pnpla2         | NM_001163689.1       | TCACCAGCCACTCACTATGC             | CTGCCAGGACTCAGAGAACC             |
| Mouse          | Fasn           | NM_007988.3          | CCAGAGCCCAGACAGAGAAG             | GACGCCAGTGTTTCGTTCC              |
| Mouse          | Gapdh          | GU214026.1           | TGTCAGCAATGCATCCTGCA             | GGAYACATTGGGGGTAGGAACAC          |
| Human          | Pnpla3         | NM_025225.2          | CTGGGAGAGATATGCCTTCG             | ATTCCACAGGCAGGGTACAG             |
| Human          | Chrebp         | NM_032951            | CAGGGTCCAGGTTTCACACT             | CTCCTCTTTCCACCGTTGAG             |
| Human          | Fas            | U26644               | CCCACCTACGTACTIONGCTA            | GGATACTTTCCCGTCGCATA             |
| Human          | Acc-1          | U19822.1             | CCCTCTCCCCACCAAATTAT             | TCTGAAGCTCCTGCTCATCA             |
| Human          | Fgf21          | NM_019113.2          | ACTCCAGTCCTCTCCTGCAA             | AGTGGAGCGATCCATACAGG             |
| Human          | $\beta$ -actin | JN038572.1           | CACTCTTCCAGCCTTCCTTCC            | CGTACAGGTCTTTGCGGATGTC           |
