# Supplementary material
Source: PubMed Central journal article supplement (PMC4175036)
Supplement: NIHMS608533-supplement-02.pdf [file NIHMS608533-supplement-02.pdf]

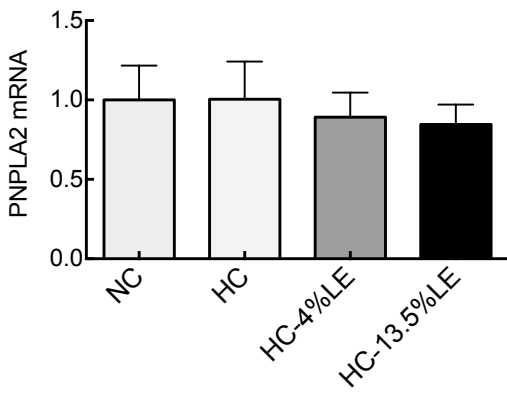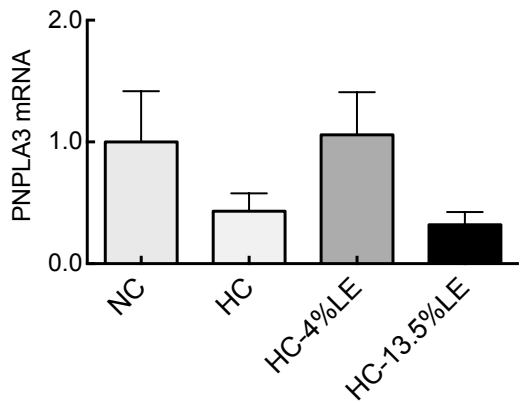

A

B

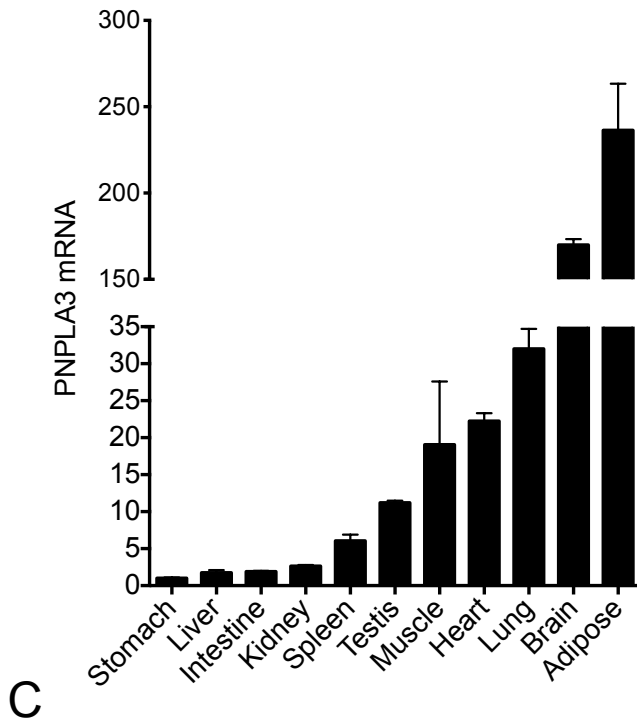

C

Supplementary Figure 1. PNPLA2 and PNPLA3 mRNA, relative expression compared to NC group, in (A) liver and (B) epididymal adipose tissue, and expression pattern of PNPLA3 in mouse tissues (C). Relative levels of PNPLA3 mRNA in different tissues and organs of 10-week-old male C57BL/6 mice were measured by RT-PCR. Each bar represents the mean of duplicate measurements.
