# Supplementary material
Source: PubMed Central journal article supplement (PMC4175036)
Supplement: NIHMS608533-supplement-03.pdf [file NIHMS608533-supplement-03.pdf]

Low glucose    High glucose    2-deoxy-D-glucose

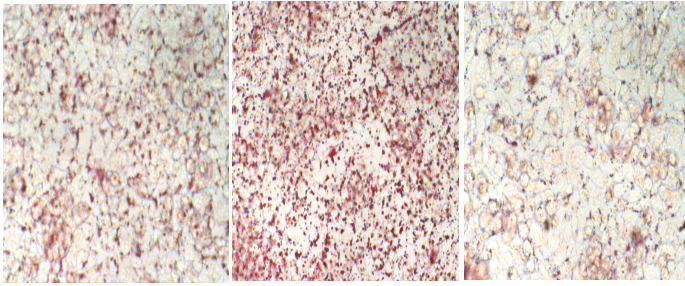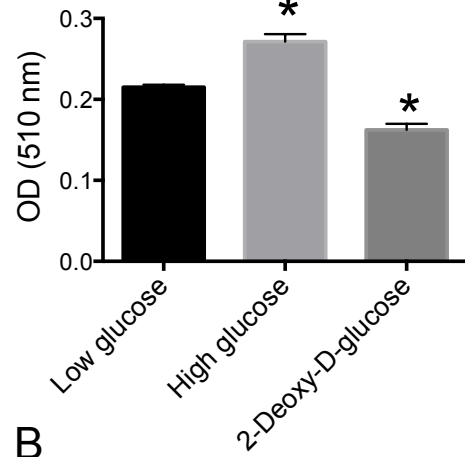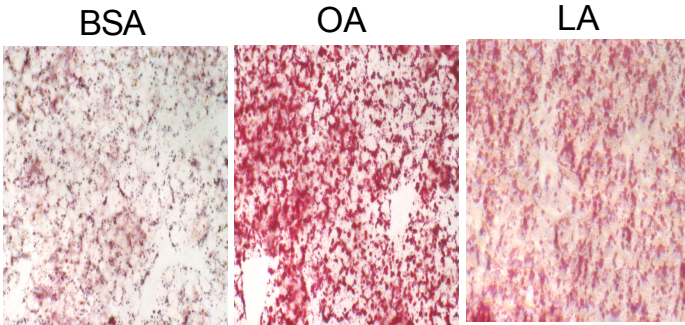

B

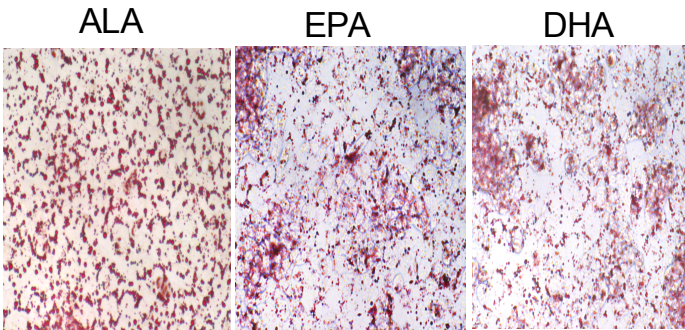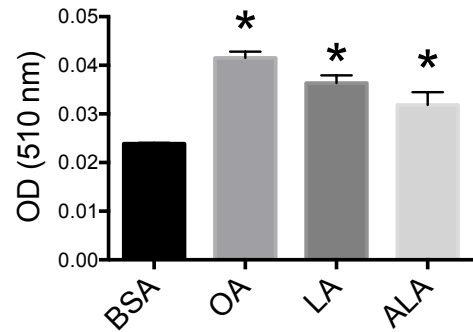

A

C

Supplementary Figure 2. Lipid content in HepG2 cells exposed to indicated conditions. (A) Oil Red O staining (magnification x 400) after exposure to 400  $\mu$ M fatty acid complexed with BSA for 24 h; (B) and (C) Oil Red O dye extraction and colorimetric assay. Results are expressed as mean  $\pm$  SEM. \*  $P < 0.05$  compared with low glucose (B) or BSA (C). BSA, bovine serum albumin; OA, oleic acid; LA, linoleic acid; ALA,  $\alpha$ -linolenic acid; EPA, eicosapentaenoic acid; DHA, docosahexaenoic acid.
