# Supplementary material
Source: PubMed Central journal article supplement (PMC4175036)
Supplement: NIHMS608533-supplement-04.pdf [file NIHMS608533-supplement-04.pdf]

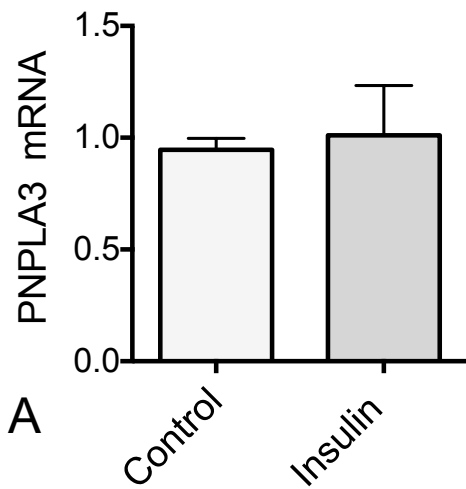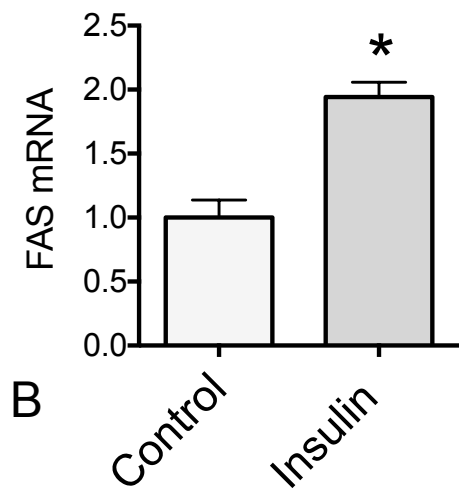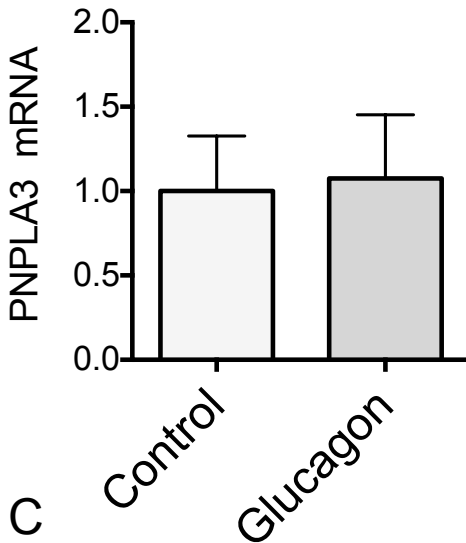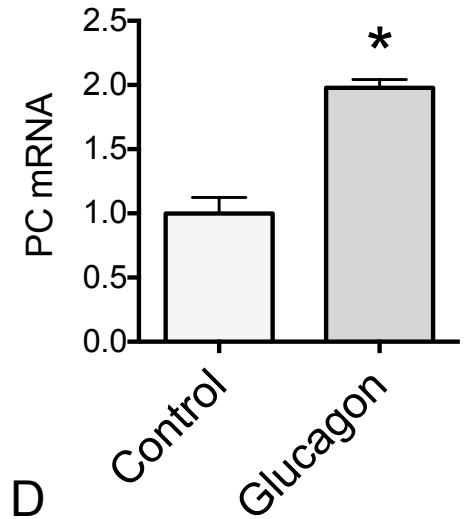

Supplementary Figure 3. Hormonal regulation of PNPLA3 in HepG2 cells. HepG2 cells were incubated in DMEM with either 10 nM insulin (A and B) or 100 nM glucagon (C and D) for 24 h, and mRNA levels of PNPLA3, FAS, and PC were determined by RT-PCR. \*,  $P < 0.05$ , Student's  $t$ -test, experimental groups versus controls.
